# Supplementary material for: Personalized survival predictions via Trees of Predictors: An application to cardiac transplantation
Source: PubMed Central journal article supplement (PMC5874060; doi:10.1371/journal.pone.0194985), 2018-03-28
Supplement: pone.0194985.s001.pdf [file pone.0194985.s001.pdf]

**S1 Table.** Features used in ToPs/R

| Recipient          |                        | Donor         | Compatibility     |
|--------------------|------------------------|---------------|-------------------|
| Age                | Blood Type AB          | Age           | ABO Compatibility |
| Gender             | Dialysis               | Gender        | Ischemic time     |
| Height             | IABP                   | Height        | HLA Mismatch      |
| Weight             | Days in State 1        | Weight        | A Mismatch        |
| Diabetes           | Days in State 1A       | Blood Type A  | B Mismatch        |
| Infection          | Days in State 2        | Blood Type B  | DR Mismatch       |
| Transfusion        | Days in State 1B       | Blood Type O  |                   |
| Previous Tx        | BMI                    | Blood Type AB |                   |
| of Previous Tx     | LVAD Assist            | HEP C Antigen |                   |
| Ventilator Assist  | Total Artificial Heart | Diabetes      |                   |
| ECMO Assist        | Inotropic              | BMI           |                   |
| Circulatory Assist | EF                     | Infection     |                   |
| Creatinine         | pk VO2                 | Bilirubin     |                   |
| Bilirubin          | ACE inhibitor          | Creatinine    |                   |
| PRA                | Beta Blocker           |               |                   |
| Blood Type A       | Blood Type B           |               |                   |
| Blood Type O       |                        |               |                   |
