# Supplementary material for: Personalized survival predictions via Trees of Predictors: An application to cardiac transplantation
Source: PubMed Central journal article supplement (PMC5874060; doi:10.1371/journal.pone.0194985), 2018-03-28
Supplement: pone.0194985.s002.pdf [file pone.0194985.s002.pdf]

**S2 Table.** Features used in medical score for post-transplantation

| <b>DRI</b>     | <b>RSS</b>                        | <b>IMPACT</b>                 |
|----------------|-----------------------------------|-------------------------------|
| Ischemic Time  | Recipient Age                     | Recipient Age                 |
| Donor Age      | Previous Cardiac Surgery          | Total Bilirubin               |
| Recipient Race | Etiology                          | Creatinine                    |
| Donor Race     | Diabetes complicated by CVA       | Dialysis in listing           |
| BUN            | eGFR                              | Recipient Gender              |
| Creatinine     | Total Bilirubin                   | Total Bilirubin               |
|                | Acuity (Intubated / Hospitalized) | Heart Failure Etiology        |
|                | RVAD only Support                 | Infection                     |
|                | ECMO Support                      | IABP Support                  |
|                | Extracorporeal LVAD Support       | Mechanical Ventilator Support |
|                | Total Artificial Heart Support    | Recipient Race                |
|                | Paracorporeal LVAD Support        |                               |
|                | Donor HEP C                       |                               |
|                | Insulin Dependent Donor           |                               |
|                | Donor Age (years)                 |                               |
|                | Ischemic Time (hours)             |                               |
|                | Donor Gender                      |                               |
|                | Recipient Gender                  |                               |
