# Supplementary material for: Personalized survival predictions via Trees of Predictors: An application to cardiac transplantation
Source: PubMed Central journal article supplement (PMC5874060; doi:10.1371/journal.pone.0194985), 2018-03-28
Supplement: pone.0194985.s003.pdf [file pone.0194985.s003.pdf]

**S3 Table.** Abbreviations

| No | Abbreviation      | Meaning                                                      |
|----|-------------------|--------------------------------------------------------------|
| 1  | ACE               | Angiotensin-converting Enzyme                                |
| 2  | ACEI              | Angiotensin-converting Enzyme Inhibitor                      |
| 3  | ARB               | Angiotensin Receptor Blocker                                 |
| 4  | AUC               | Area Under the Curve                                         |
| 5  | BMI               | Body Mass Index                                              |
| 6  | BNP               | B-type Natriuretic Peptide                                   |
| 7  | BUN               | Blood Urea Nitrogen                                          |
| 8  | COPD              | chronic obstructive pulmonary disease                        |
| 9  | CVA               | Cerebrovascular Accident                                     |
| 10 | DRI               | Donor Risk Index                                             |
| 11 | ECMO              | Extracorporeal Membrane Oxygenation                          |
| 12 | EF                | Ejection Fraction                                            |
| 13 | eGFR              | Estimated Glomerular Filtration Rate                         |
| 14 | HEP               | Hepatitis                                                    |
| 15 | HFSS              | Heart Failure Survival Score                                 |
| 16 | HLA               | Human leukocyte antigen                                      |
| 17 | IABP              | Intra-Aortic Balloon Pump                                    |
| 18 | IMPACT            | Index for Mortality Prediction After Cardiac Transplantation |
| 19 | LVAD              | Left Ventricular Assist Device                               |
| 20 | LVEF              | Left Ventricular Ejection Fraction                           |
| 21 | MAGGIC            | Meta-Analysis Global Group in Chronic Heart Failure          |
| 22 | NYHA              | New York Heart Association                                   |
| 23 | pkVO <sub>2</sub> | Peak Oxygen Consumption by Cardiopulmonary Exercise Testing  |
| 24 | PRA               | Panel Reactive Antibody                                      |
| 25 | RSS               | Recipient Stratification Score                               |
| 26 | RVAD              | Right Ventricular Assist Device                              |
