# Supplementary material for: Personalized survival predictions via Trees of Predictors: An application to cardiac transplantation
Source: PubMed Central journal article supplement (PMC5874060; doi:10.1371/journal.pone.0194985), 2018-03-28
Supplement: pone.0194985.s004.pdf [file pone.0194985.s004.pdf]

**S1 Algorithm.** Pseudo-code of ToPs/R

---

**Off-line Stage 0: Dividing the dataset ( $D$ )**

---

**Input:** Entire dataset  $D$

**Divide**  $D$  into disjoint training set ( $S$ ), the first validation set ( $V^1$ ), the second validation set ( $V^2$ ) and testing set ( $T$ ) which satisfy  $D = S \cup V^1 \cup V^2 \cup T$

**Output:** Training set  $S$ , validation sets  $V^1, V^2$ , and testing set  $T$

---

**Off-line Stage 1: Growing the Optimal Tree of Predictors**

---

**Input:** Feature space  $X$ , a set of algorithms  $\mathcal{A}$ , training set  $S$ , the validation set  $V^1$

**First step:** Initial tree of predictors =  $(X, h_X)$  where  $h_X = \arg \min_{A \in \mathcal{A}}$

**Recursive step:**

**Input:** Current tree of predictors  $(T, \{h_C\})$

**for** each terminal node  $C \in T$  **do**

**for** a feature  $i$  and a threshold  $\tau_i$  **do**

        Set  $C^-(\tau_i) = \{x \in C : x_i < \tau_i\}, C^+(\tau_i) = \{x \in C : x_i \geq \tau_i\}$ , Then,

$\{i^*, \tau_i^*, h_{C^-(\tau_i^*)}, h_{C^+(\tau_i^*)}\} = \arg \min \mathcal{L}(h^- \cup h^+, V^1(C^-(\tau_i)) \cup V^1(C^+(\tau_i)))$

        where  $h^- \in A(C^-(\tau_i)^\dagger), h^+ \in A(C^+(\tau_i)^\dagger)$

**Stopping Criteria:**  $\mathcal{L}(h_C, V^1(C)) \leq \min \mathcal{L}(h^- \cup h^+, V^1(C^-(\tau_i)) \cup V^1(C^+(\tau_i)))$

**Output:** Locally optimal tree of predictors  $(T, \{h_C\})$

---

**Off-line Stage 2: Weights Optimization on the Path**

---

**Input:** Locally optimal tree of predictors  $(T, \{h_C\})$ , the second validation set  $V^2$

**for** each terminal node  $\bar{C}$  and the corresponding path  $\Pi$  from  $X$  to  $\bar{C}$  **do**

**for** each weight vector  $w = (w_C)$ , **do**

        Define  $H_w = \sum_{C \in \Pi} w_C h_C$ , Then,

$w^*(\Pi) = (w^*(\Pi, \bar{C})) = \arg \min \mathcal{L}(H_w, V^2(\bar{C}))$

**Output:** Optimized weights  $w^*(\Pi)$  for each terminal node  $\bar{C}$  and corresponding path  $\Pi$

---

**On-line Stage: Overall Predictor**

---

**Input:** Locally optimal tree of predictors  $(T, \{h_C\})$ , optimized weights  $w^*(\Pi)$ , and testing set  $T$

    Given a feature vector  $x$

    Find the unique path  $\Pi(x)$  from  $X$  to terminal node containing  $x$

    Then,  $H(x) = \sum_{C \in \Pi(x)} w^*(\Pi, C) h_C(x)$

**Output:** The final prediction  $H(x)$

---
